# Supplementary material for: Effective biomarkers and therapeutic targets of nerve-immunity interaction in the treatment of depression: an integrated investigation of the miRNA-mRNA regulatory networks
Source: PubMed Central journal article supplement (PMC9085226; doi:10.18632/aging.204030), 2022-04-25
Supplement: aging-14-204030-s002.pdf [file aging-14-204030-s002.pdf]

## SUPPLEMENTARY TABLES

**Supplementary Table 5. BP of DE-miRNAs.**

| <b>Biological process</b>                                                    | <b>Percentage of genes</b> | <b><i>p</i>-value</b> | <b><i>p</i> = 0.05 references</b> |
|------------------------------------------------------------------------------|----------------------------|-----------------------|-----------------------------------|
| Regulation of nucleobase, nucleoside, nucleotide and nucleic acid metabolism | 19.61301671                | 1.723636772           | 1.301029996                       |
| Signal transduction                                                          | 25.41776605                | 0.691560447           | 1.301029996                       |
| Cell communication                                                           | 23.21899736                | 0                     | 1.301029996                       |
| Synaptic transmission                                                        | 0.175901495                | 0                     | 1.301029996                       |
| Protein transport                                                            | 0.263852243                | 0                     | 1.301029996                       |
| Cytoskeleton organization and biogenesis                                     | 0.35180299                 | 0                     | 1.301029996                       |
| Regulation of cell growth                                                    | 0.35180299                 | 0                     | 1.301029996                       |
| Transport                                                                    | 7.915567282                | 0                     | 1.301029996                       |
| Nucleobase, nucleoside, nucleotide and nucleic acid transport                | 0.175901495                | 0                     | 1.301029996                       |
| Vitamin metabolism                                                           | 0.087950748                | 0                     | 1.301029996                       |
| RNA localization                                                             | 0.087950748                | 0                     | 1.301029996                       |
| DNA metabolism                                                               | 0.087950748                | 0                     | 1.301029996                       |
| Cell cycle                                                                   | 0.263852243                | 0                     | 1.301029996                       |
| Steroid metabolism                                                           | 0.087950748                | 0                     | 1.301029996                       |
| Wound healing                                                                | 0.087950748                | 0                     | 1.301029996                       |
| Endosome transport                                                           | 0.087950748                | 0                     | 1.301029996                       |
| Signal complex formation                                                     | 0.087950748                | 0                     | 1.301029996                       |
| Regulation of translation                                                    | 0.175901495                | 0                     | 1.301029996                       |
| Cell proliferation                                                           | 0.35180299                 | 0                     | 1.301029996                       |
| Cell recognition                                                             | 0.087950748                | 0                     | 1.301029996                       |
| Regulation of endocytosis                                                    | 0.087950748                | 0                     | 1.301029996                       |
| Neurotransmitter transport                                                   | 0.087950748                | 0                     | 1.301029996                       |
| Vesicle docking                                                              | 0.087950748                | 0                     | 1.301029996                       |
| Regulation of gene expression, epigenetic                                    | 0.527704485                | 0                     | 1.301029996                       |
| Cell migration                                                               | 0.175901495                | 0                     | 1.301029996                       |
| Regulation of metabolism                                                     | 0.087950748                | 0                     | 1.301029996                       |
| Regulation of exocytosis                                                     | 0.087950748                | 0                     | 1.301029996                       |
| Protein targeting                                                            | 0.087950748                | 0                     | 1.301029996                       |
| Regulation of cell cycle                                                     | 0.439753738                | 0                     | 1.301029996                       |
| Development                                                                  | 0.087950748                | 0                     | 1.301029996                       |
| Protein modification                                                         | 0.175901495                | 0                     | 1.301029996                       |
| Cell organization and biogenesis                                             | 0.087950748                | 0                     | 1.301029996                       |
| Carbohydrate metabolism                                                      | 0.087950748                | 0                     | 1.301029996                       |
| Cell surface receptor linked signal transduction                             | 0.087950748                | 0                     | 1.301029996                       |
| Regulation of immune response                                                | 0.087950748                | 0                     | 1.301029996                       |
| Regulation of signal transduction                                            | 0.175901495                | 0                     | 1.301029996                       |
| G-protein coupled receptor protein signaling pathway                         | 0.087950748                | 0                     | 1.301029996                       |

|                                  |             |   |             |
|----------------------------------|-------------|---|-------------|
| RNA metabolism                   | 0.175901495 | 0 | 1.301029996 |
| Embryonic development            | 0.087950748 | 0 | 1.301029996 |
| Apoptosis                        | 1.231310466 | 0 | 1.301029996 |
| Cell-cell adhesion               | 0.087950748 | 0 | 1.301029996 |
| Cell differentiation             | 0.175901495 | 0 | 1.301029996 |
| Anti-apoptosis                   | 0.175901495 | 0 | 1.301029996 |
| Protein folding                  | 0.087950748 | 0 | 1.301029996 |
| Cell-cell signaling              | 0.087950748 | 0 | 1.301029996 |
| Vesicle-mediated transport       | 0.087950748 | 0 | 1.301029996 |
| Cell motility                    | 0.087950748 | 0 | 1.301029996 |
| Regulation of cell proliferation | 0.087950748 | 0 | 1.301029996 |
| Transcription                    | 0.175901495 | 0 | 1.301029996 |
| Protein metabolism               | 6.596306069 | 0 | 1.301029996 |
| Cell adhesion                    | 0.175901495 | 0 | 1.301029996 |
| Lipid metabolism                 | 0.087950748 | 0 | 1.301029996 |
| Cell growth and/or maintenance   | 5.277044855 | 0 | 1.301029996 |
| Ion transport                    | 0.087950748 | 0 | 1.301029996 |
| DNA repair                       | 0.087950748 | 0 | 1.301029996 |
| Metabolism                       | 7.299912049 | 0 | 1.301029996 |
| Energy pathways                  | 6.860158311 | 0 | 1.301029996 |
| Biological_process unknown       | 22.51539138 | 0 | 1.301029996 |
| Immune response                  | 1.231310466 | 0 | 1.301029996 |

**Supplementary Table 6. 16 core target genes of hub DE-mRNAs.**

| <b>Name</b> | <b>SUID</b> | <b>Betweenness</b> | <b>Closeness</b> | <b>Degree</b> |
|-------------|-------------|--------------------|------------------|---------------|
| CACNA2D1    | 72          | 3.666666667        | 0.277777778      | 5             |
| SNAP25      | 73          | 34.833333333       | 0.3125           | 11            |
| GJA1        | 75          | 4.666666667        | 0.283018868      | 6             |
| KCND2       | 77          | 54.666666667       | 0.306122449      | 9             |
| GNAI1       | 79          | 0.5                | 0.25862069       | 3             |
| TUSC3       | 81          | 0                  | 0.272727273      | 4             |
| CHL1        | 83          | 11.666666667       | 0.288461538      | 7             |
| SOX9        | 84          | 0.5                | 0.263157895      | 4             |
| PCDH17      | 87          | 1                  | 0.263157895      | 4             |
| MYT1L       | 92          | 4.5                | 0.283018868      | 6             |
| SASH3       | 101         | 24                 | 0.254237288      | 2             |
| LMO3        | 103         | 2                  | 0.277777778      | 5             |
| NOVA1       | 105         | 2                  | 0.277777778      | 5             |
| MAL2        | 112         | 0                  | 0.066666667      | 1             |
| RAB37       | 113         | 0                  | 0.066666667      | 1             |
| RNASE6      | 121         | 0                  | 0.211267606      | 1             |

**Supplementary Table 7. Filter once after the 5 core target genes of hub DE-mRNAs.**

| LAC | SUID | Betweenness | Closeness | Degree |
|-----|------|-------------|-----------|--------|
| 2.5 | 77   | 0.666666667 | 1         | 4      |
| 2   | 92   | 0           | 0.8       | 3      |
| 2   | 75   | 0           | 0.8       | 3      |
| 2.5 | 83   | 0.666666667 | 1         | 4      |
| 2.5 | 73   | 0.666666667 | 1         | 4      |

**Supplementary Table 8. MF of interaction mRNA of miRNA-mRNA regulatory network.**

| ID         | Description                                                  | GeneRatio | p.adjust    | Count |
|------------|--------------------------------------------------------------|-----------|-------------|-------|
| GO:0140375 | immune receptor activity                                     | 21/352    | 9.01E-11    | 21    |
| GO:0004896 | cytokine receptor activity                                   | 15/352    | 1.37E-07    | 15    |
| GO:0035325 | Toll-like receptor binding                                   | 5/352     | 0.000228123 | 5     |
| GO:0019955 | cytokine binding                                             | 13/352    | 0.000228123 | 13    |
| GO:0004715 | non-membrane spanning protein tyrosine kinase activity       | 8/352     | 0.000228123 | 8     |
| GO:0019956 | chemokine binding                                            | 7/352     | 0.000228123 | 7     |
| GO:0022851 | GABA-gated chloride ion channel activity                     | 5/352     | 0.000228123 | 5     |
| GO:0016493 | C-C chemokine receptor activity                              | 6/352     | 0.000228123 | 6     |
| GO:0038187 | pattern recognition receptor activity                        | 6/352     | 0.000228123 | 6     |
| GO:0019957 | C-C chemokine binding                                        | 6/352     | 0.000269341 | 6     |
| GO:0001637 | G protein-coupled chemoattractant receptor activity          | 6/352     | 0.000371676 | 6     |
| GO:0004950 | chemokine receptor activity                                  | 6/352     | 0.000371676 | 6     |
| GO:0005001 | transmembrane receptor protein tyrosine phosphatase activity | 5/352     | 0.000517705 | 5     |
| GO:0019198 | transmembrane receptor protein phosphatase activity          | 5/352     | 0.000517705 | 5     |
| GO:0099095 | ligand-gated anion channel activity                          | 5/352     | 0.000658534 | 5     |
| GO:0004890 | GABA-A receptor activity                                     | 5/352     | 0.000752724 | 5     |
| GO:0019911 | structural constituent of myelin sheath                      | 4/352     | 0.000752724 | 4     |
| GO:0050786 | RAGE receptor binding                                        | 4/352     | 0.000752724 | 4     |
| GO:0071723 | lipopeptide binding                                          | 4/352     | 0.000752724 | 4     |
| GO:0048306 | calcium-dependent protein binding                            | 9/352     | 0.000926647 | 9     |
| GO:0042608 | T cell receptor binding                                      | 4/352     | 0.001054007 | 4     |
| GO:0016917 | GABA receptor activity                                       | 5/352     | 0.001295489 | 5     |
| GO:0030246 | carbohydrate binding                                         | 16/352    | 0.001517833 | 16    |
| GO:0019865 | immunoglobulin binding                                       | 5/352     | 0.001857169 | 5     |
| GO:0017075 | syntaxin-1 binding                                           | 5/352     | 0.002570744 | 5     |
| GO:0023023 | MHC protein complex binding                                  | 5/352     | 0.002570744 | 5     |
| GO:0022824 | transmitter-gated ion channel activity                       | 7/352     | 0.002614215 | 7     |
| GO:0022835 | transmitter-gated channel activity                           | 7/352     | 0.002614215 | 7     |
| GO:0015108 | chloride transmembrane transporter activity                  | 9/352     | 0.002692073 | 9     |
| GO:0015267 | channel activity                                             | 22/352    | 0.002692073 | 22    |
| GO:0022803 | passive transmembrane transporter activity                   | 22/352    | 0.002692073 | 22    |
| GO:0005237 | inhibitory extracellular ligand-gated ion channel activity   | 4/352     | 0.002692073 | 4     |

|            |                                                                                                  |        |             |    |
|------------|--------------------------------------------------------------------------------------------------|--------|-------------|----|
| GO:0017124 | SH3 domain binding                                                                               | 10/352 | 0.003006658 | 10 |
| GO:0001784 | phosphotyrosine residue binding                                                                  | 6/352  | 0.003006658 | 6  |
| GO:0003953 | NAD+ nucleosidase activity                                                                       | 4/352  | 0.003057546 | 4  |
| GO:0050135 | NAD(P)+ nucleosidase activity                                                                    | 4/352  | 0.003057546 | 4  |
| GO:0061809 | NAD+ nucleotidase, cyclic ADP-ribose generating                                                  | 4/352  | 0.003057546 | 4  |
| GO:0099529 | neurotransmitter receptor activity involved in regulation of postsynaptic membrane potential     | 6/352  | 0.003898996 | 6  |
| GO:0004713 | protein tyrosine kinase activity                                                                 | 10/352 | 0.004040285 | 10 |
| GO:0030594 | neurotransmitter receptor activity                                                               | 9/352  | 0.004044242 | 9  |
| GO:0005230 | extracellular ligand-gated ion channel activity                                                  | 7/352  | 0.006780537 | 7  |
| GO:0005254 | chloride channel activity                                                                        | 7/352  | 0.007192201 | 7  |
| GO:0001882 | nucleoside binding                                                                               | 18/352 | 0.007480743 | 18 |
| GO:0001848 | complement binding                                                                               | 4/352  | 0.007837425 | 4  |
| GO:0045309 | protein phosphorylated amino acid binding                                                        | 6/352  | 0.008614962 | 6  |
| GO:0042169 | SH2 domain binding                                                                               | 5/352  | 0.009055381 | 5  |
| GO:0016176 | superoxide-generating NADPH oxidase activator activity                                           | 3/352  | 0.009055381 | 3  |
| GO:0022836 | gated channel activity                                                                           | 16/352 | 0.00993357  | 16 |
| GO:0005525 | GTP binding                                                                                      | 17/352 | 0.011094302 | 17 |
| GO:0008503 | benzodiazepine receptor activity                                                                 | 3/352  | 0.011094302 | 3  |
| GO:0016175 | superoxide-generating NAD(P)H oxidase activity                                                   | 3/352  | 0.011094302 | 3  |
| GO:0019864 | IgG binding                                                                                      | 3/352  | 0.011094302 | 3  |
| GO:0032550 | purine ribonucleoside binding                                                                    | 17/352 | 0.012346261 | 17 |
| GO:0098960 | postsynaptic neurotransmitter receptor activity                                                  | 6/352  | 0.012346261 | 6  |
| GO:0001883 | purine nucleoside binding                                                                        | 17/352 | 0.012761612 | 17 |
| GO:0032549 | ribonucleoside binding                                                                           | 17/352 | 0.012761612 | 17 |
| GO:0005253 | anion channel activity                                                                           | 7/352  | 0.013011667 | 7  |
| GO:0051219 | phosphoprotein binding                                                                           | 7/352  | 0.013681766 | 7  |
| GO:0003924 | GTPase activity                                                                                  | 15/352 | 0.013865507 | 15 |
| GO:1904315 | transmitter-gated ion channel activity involved in regulation of postsynaptic membrane potential | 5/352  | 0.013865507 | 5  |
| GO:0005216 | ion channel activity                                                                             | 18/352 | 0.015503232 | 18 |
| GO:0036041 | long-chain fatty acid binding                                                                    | 3/352  | 0.015674859 | 3  |
| GO:0019001 | guanyl nucleotide binding                                                                        | 17/352 | 0.016334476 | 17 |
| GO:0032561 | guanyl ribonucleotide binding                                                                    | 17/352 | 0.016334476 | 17 |
| GO:0015103 | inorganic anion transmembrane transporter activity                                               | 9/352  | 0.016936842 | 9  |
| GO:0015631 | tubulin binding                                                                                  | 16/352 | 0.0178735   | 16 |
| GO:0045028 | G protein-coupled purinergic nucleotide receptor activity                                        | 3/352  | 0.017942731 | 3  |
| GO:0008017 | microtubule binding                                                                              | 13/352 | 0.017942731 | 13 |
| GO:0001846 | opsonin binding                                                                                  | 3/352  | 0.021467256 | 3  |
| GO:0097153 | cysteine-type endopeptidase activity involved in apoptotic process                               | 3/352  | 0.021467256 | 3  |
| GO:0031406 | carboxylic acid binding                                                                          | 10/352 | 0.023664169 | 10 |
| GO:0050664 | oxidoreductase activity, acting on NAD(P)H, oxygen as acceptor                                   | 3/352  | 0.024977807 | 3  |
| GO:0050700 | CARD domain binding                                                                              | 3/352  | 0.024977807 | 3  |

|            |                                                                              |       |             |   |
|------------|------------------------------------------------------------------------------|-------|-------------|---|
| GO:0023026 | MHC class II protein complex binding                                         | 3/352 | 0.029105081 | 3 |
| GO:0098918 | structural constituent of synapse                                            | 3/352 | 0.029105081 | 3 |
| GO:0005504 | fatty acid binding                                                           | 4/352 | 0.039026991 | 4 |
| GO:0015276 | ligand-gated ion channel activity                                            | 8/352 | 0.039026991 | 8 |
| GO:0022834 | ligand-gated channel activity                                                | 8/352 | 0.039026991 | 8 |
| GO:0001540 | amyloid-beta binding                                                         | 6/352 | 0.03929177  | 6 |
| GO:0016799 | hydrolase activity, hydrolyzing N-glycosyl compounds                         | 4/352 | 0.041154883 | 4 |
| GO:0005178 | integrin binding                                                             | 8/352 | 0.042635723 | 8 |
| GO:0043028 | cysteine-type endopeptidase regulator activity involved in apoptotic process | 4/352 | 0.048026669 | 4 |
| GO:0001614 | purinergic nucleotide receptor activity                                      | 3/352 | 0.048026669 | 3 |

**Supplementary Table 9. CC of interaction mRNA of miRNA-mRNA regulatory network.**

| <b>ID</b>  | <b>Description</b>                           | <b>GeneRatio</b> | <b>p.adjust</b> | <b>Count</b> |
|------------|----------------------------------------------|------------------|-----------------|--------------|
| GO:0030667 | secretory granule membrane                   | 28/364           | 1.68E-09        | 28           |
| GO:0098978 | glutamatergic synapse                        | 26/364           | 3.23E-08        | 26           |
| GO:0097060 | synaptic membrane                            | 28/364           | 4.63E-08        | 28           |
| GO:0009897 | external side of plasma membrane             | 29/364           | 5.80E-08        | 29           |
| GO:0098793 | presynapse                                   | 31/364           | 2.42E-07        | 31           |
| GO:0098984 | neuron to neuron synapse                     | 25/364           | 4.74E-07        | 25           |
| GO:0034774 | secretory granule lumen                      | 24/364           | 5.56E-07        | 24           |
| GO:0070820 | tertiary granule                             | 17/364           | 5.56E-07        | 17           |
| GO:0060205 | cytoplasmic vesicle lumen                    | 24/364           | 5.56E-07        | 24           |
| GO:0031983 | vesicle lumen                                | 24/364           | 5.63E-07        | 24           |
| GO:0098982 | GABA-ergic synapse                           | 11/364           | 9.23E-07        | 11           |
| GO:0045121 | membrane raft                                | 23/364           | 1.44E-06        | 23           |
| GO:0098857 | membrane microdomain                         | 23/364           | 1.44E-06        | 23           |
| GO:0099240 | intrinsic component of synaptic membrane     | 15/364           | 1.65E-06        | 15           |
| GO:0099699 | integral component of synaptic membrane      | 14/364           | 3.30E-06        | 14           |
| GO:0042734 | presynaptic membrane                         | 14/364           | 7.23E-06        | 14           |
| GO:0043025 | neuronal cell body                           | 27/364           | 7.29E-06        | 27           |
| GO:0099572 | postsynaptic specialization                  | 22/364           | 7.51E-06        | 22           |
| GO:0101002 | ficolin-1-rich granule                       | 16/364           | 8.69E-06        | 16           |
| GO:0098802 | plasma membrane signaling receptor complex   | 21/364           | 1.21E-05        | 21           |
| GO:0045211 | postsynaptic membrane                        | 19/364           | 1.21E-05        | 19           |
| GO:0014069 | postsynaptic density                         | 20/364           | 3.54E-05        | 20           |
| GO:0032279 | asymmetric synapse                           | 20/364           | 4.32E-05        | 20           |
| GO:0098889 | intrinsic component of presynaptic membrane  | 9/364            | 4.65E-05        | 9            |
| GO:0031225 | anchored component of membrane               | 14/364           | 6.26E-05        | 14           |
| GO:0098936 | intrinsic component of postsynaptic membrane | 11/364           | 6.61E-05        | 11           |
| GO:0099056 | integral component of presynaptic membrane   | 8/364            | 0.00013213      | 8            |
| GO:0045335 | phagocytic vesicle                           | 12/364           | 0.000136097     | 12           |
| GO:1902495 | transmembrane transporter complex            | 19/364           | 0.000159039     | 19           |

|            |                                                             |        |             |    |
|------------|-------------------------------------------------------------|--------|-------------|----|
| GO:0034702 | ion channel complex                                         | 18/364 | 0.000209447 | 18 |
| GO:0099055 | integral component of postsynaptic membrane                 | 10/364 | 0.000229285 | 10 |
| GO:1902711 | GABA-A receptor complex                                     | 5/364  | 0.000260303 | 5  |
| GO:1990351 | transporter complex                                         | 19/364 | 0.000263284 | 19 |
| GO:1902710 | GABA receptor complex                                       | 5/364  | 0.000321676 | 5  |
| GO:0043197 | dendritic spine                                             | 13/364 | 0.000336742 | 13 |
| GO:0044309 | neuron spine                                                | 13/364 | 0.000347337 | 13 |
| GO:0042581 | specific granule                                            | 12/364 | 0.000524537 | 12 |
| GO:0035579 | specific granule membrane                                   | 9/364  | 0.000537283 | 9  |
| GO:0070821 | tertiary granule membrane                                   | 8/364  | 0.000657384 | 8  |
| GO:0030139 | endocytic vesicle                                           | 17/364 | 0.000706349 | 17 |
| GO:0001772 | immunological synapse                                       | 6/364  | 0.001032584 | 6  |
| GO:0043204 | perikaryon                                                  | 11/364 | 0.001232409 | 11 |
| GO:0101003 | ficolin-1-rich granule membrane                             | 7/364  | 0.001279911 | 7  |
| GO:0098686 | hippocampal mossy fiber to CA3 synapse                      | 5/364  | 0.001960147 | 5  |
| GO:0099060 | integral component of postsynaptic specialization membrane  | 7/364  | 0.002016145 | 7  |
| GO:0098685 | Schaffer collateral - CA1 synapse                           | 7/364  | 0.002167655 | 7  |
| GO:0044291 | cell-cell contact zone                                      | 7/364  | 0.002496484 | 7  |
| GO:0098948 | intrinsic component of postsynaptic specialization membrane | 7/364  | 0.002496484 | 7  |
| GO:0034707 | chloride channel complex                                    | 6/364  | 0.002652121 | 6  |
| GO:0005911 | cell-cell junction                                          | 21/364 | 0.002677307 | 21 |
| GO:0030665 | clathrin-coated vesicle membrane                            | 9/364  | 0.002762444 | 9  |
| GO:1904813 | ficolin-1-rich granule lumen                                | 9/364  | 0.004137096 | 9  |
| GO:1904724 | tertiary granule lumen                                      | 6/364  | 0.004137096 | 6  |
| GO:0034703 | cation channel complex                                      | 12/364 | 0.007380051 | 12 |
| GO:0099634 | postsynaptic specialization membrane                        | 8/364  | 0.007380051 | 8  |
| GO:0150034 | distal axon                                                 | 14/364 | 0.007587933 | 14 |
| GO:0032590 | dendrite membrane                                           | 5/364  | 0.008383255 | 5  |
| GO:0043020 | NADPH oxidase complex                                       | 3/364  | 0.008717461 | 3  |
| GO:0019897 | extrinsic component of plasma membrane                      | 10/364 | 0.008969762 | 10 |
| GO:0019898 | extrinsic component of membrane                             | 14/364 | 0.012170347 | 14 |
| GO:0014704 | intercalated disc                                           | 5/364  | 0.012916047 | 5  |
| GO:0030427 | site of polarized growth                                    | 10/364 | 0.016006508 | 10 |
| GO:0008305 | integrin complex                                            | 4/364  | 0.016159135 | 4  |
| GO:0031234 | extrinsic component of cytoplasmic side of plasma membrane  | 7/364  | 0.017005993 | 7  |
| GO:0005767 | secondary lysosome                                          | 3/364  | 0.018734247 | 3  |
| GO:0044306 | neuron projection terminus                                  | 8/364  | 0.018792563 | 8  |
| GO:0030136 | clathrin-coated vesicle                                     | 10/364 | 0.020118264 | 10 |
| GO:0001518 | voltage-gated sodium channel complex                        | 3/364  | 0.02144704  | 3  |
| GO:0008021 | synaptic vesicle                                            | 10/364 | 0.023437184 | 10 |
| GO:0098636 | protein complex involved in cell adhesion                   | 4/364  | 0.025309215 | 4  |
| GO:0005938 | cell cortex                                                 | 13/364 | 0.025475952 | 13 |

|            |                            |        |             |    |
|------------|----------------------------|--------|-------------|----|
| GO:0044853 | plasma membrane raft       | 7/364  | 0.026720144 | 7  |
| GO:0032589 | neuron projection membrane | 5/364  | 0.026720144 | 5  |
| GO:0031256 | leading edge membrane      | 9/364  | 0.028876621 | 9  |
| GO:0030426 | growth cone                | 9/364  | 0.034186028 | 9  |
| GO:0099738 | cell cortex region         | 4/364  | 0.037264131 | 4  |
| GO:0030662 | coated vesicle membrane    | 9/364  | 0.037878765 | 9  |
| GO:0070382 | exocytic vesicle           | 10/364 | 0.037878765 | 10 |
| GO:0043209 | myelin sheath              | 4/364  | 0.039051334 | 4  |
| GO:0042101 | T cell receptor complex    | 8/364  | 0.039420801 | 8  |
| GO:0030133 | transport vesicle          | 15/364 | 0.044167482 | 15 |
| GO:0045178 | basal part of cell         | 11/364 | 0.046350166 | 11 |

**Supplementary Table 11. KEGG enrichment analysis of interaction mRNA of miRNA-mRNA regulatory network.**

| <b>ID</b> | <b>Description</b>                                            | <b>GeneRatio</b> | <b>p.adjust</b> | <b>Count</b> |
|-----------|---------------------------------------------------------------|------------------|-----------------|--------------|
| hsa04061  | Viral protein interaction with cytokine and cytokine receptor | 15/183           | 1.25E-06        | 15           |
| hsa04640  | Hematopoietic cell lineage                                    | 14/183           | 4.47E-06        | 14           |
| hsa04145  | Phagosome                                                     | 16/183           | 2.15E-05        | 16           |
| hsa04060  | Cytokine-cytokine receptor interaction                        | 22/183           | 4.17E-05        | 22           |
| hsa04650  | Natural killer cell mediated cytotoxicity                     | 14/183           | 5.35E-05        | 14           |
| hsa04062  | Chemokine signaling pathway                                   | 17/183           | 5.35E-05        | 17           |
| hsa05152  | Tuberculosis                                                  | 16/183           | 9.02E-05        | 16           |
| hsa05140  | Leishmaniasis                                                 | 10/183           | 0.000228964     | 10           |
| hsa04670  | Leukocyte transendothelial migration                          | 12/183           | 0.000232529     | 12           |
| hsa05340  | Primary immunodeficiency                                      | 7/183            | 0.000426694     | 7            |
| hsa04613  | Neutrophil extracellular trap formation                       | 15/183           | 0.000498815     | 15           |
| hsa05033  | Nicotine addiction                                            | 7/183            | 0.000505603     | 7            |
| hsa04380  | Osteoclast differentiation                                    | 12/183           | 0.00052506      | 12           |
| hsa04658  | Th1 and Th2 cell differentiation                              | 10/183           | 0.000641509     | 10           |
| hsa04662  | B cell receptor signaling pathway                             | 9/183            | 0.001359195     | 9            |
| hsa04659  | Th17 cell differentiation                                     | 10/183           | 0.002206169     | 10           |
| hsa04727  | GABAergic synapse                                             | 9/183            | 0.002271123     | 9            |
| hsa04666  | Fc gamma R-mediated phagocytosis                              | 9/183            | 0.004130541     | 9            |
| hsa04940  | Type I diabetes mellitus                                      | 6/183            | 0.004473396     | 6            |
| hsa04660  | T cell receptor signaling pathway                             | 9/183            | 0.006241721     | 9            |
| hsa05321  | Inflammatory bowel disease                                    | 7/183            | 0.006704208     | 7            |
| hsa04664  | Fc epsilon RI signaling pathway                               | 7/183            | 0.008418546     | 7            |
| hsa05120  | Epithelial cell signaling in Helicobacter pylori infection    | 7/183            | 0.009587179     | 7            |
| hsa05162  | Measles                                                       | 10/183           | 0.011069821     | 10           |
| hsa05150  | Staphylococcus aureus infection                               | 8/183            | 0.012950723     | 8            |
| hsa05134  | Legionellosis                                                 | 6/183            | 0.014983431     | 6            |
| hsa04514  | Cell adhesion molecules                                       | 10/183           | 0.016608347     | 10           |
| hsa05169  | Epstein-Barr virus infection                                  | 12/183           | 0.016616244     | 12           |

|          |                                                        |        |             |    |
|----------|--------------------------------------------------------|--------|-------------|----|
| hsa05332 | Graft-versus-host disease                              | 5/183  | 0.018911494 | 5  |
| hsa05417 | Lipid and atherosclerosis                              | 12/183 | 0.02595252  | 12 |
| hsa04630 | JAK-STAT signaling pathway                             | 10/183 | 0.025973268 | 10 |
| hsa04540 | Gap junction                                           | 7/183  | 0.025973268 | 7  |
| hsa05235 | PD-L1 expression and PD-1 checkpoint pathway in cancer | 7/183  | 0.026826207 | 7  |
| hsa05032 | Morphine addiction                                     | 7/183  | 0.028787971 | 7  |
| hsa05166 | Human T-cell leukemia virus 1 infection                | 12/183 | 0.028787971 | 12 |
| hsa05133 | Pertussis                                              | 6/183  | 0.045832147 | 6  |
| hsa05142 | Chagas disease                                         | 7/183  | 0.047903194 | 7  |
| hsa04612 | Antigen processing and presentation                    | 6/183  | 0.047903194 | 6  |
| hsa04721 | Synaptic vesicle cycle                                 | 6/183  | 0.047903194 | 6  |

---
